# Supplementary material
Source: PubMed Central journal article supplement (PMC2890479)
Supplement: 1001139107_pnas.1001139107_SI.pdf [file 1001139107_pnas.1001139107_SI.pdf]

# Supporting Information

Sample et al. 10.1073/pnas.1001139107

## SI Text

**Notation.** Separation of length scales is the basis of homogenization. We introduce here the small scale parameter  $\epsilon$  as the ratio of the size of the reference cell to the size of the embryo:

$$\epsilon = \frac{l}{L}.$$

To establish notation, consider the cortical region of the entire embryo to be a bounded domain  $\Omega$ . The geometric structure within  $\Omega$  is obtained by the periodic repetition of the reference cell  $Y$ , where in this periodic geometry  $\Omega_n^\epsilon$  represents a nucleus,  $\Gamma^\epsilon$  is the surface of a nucleus, and  $\Omega_c^\epsilon$  is the surrounding cytoplasm (Fig. 2C of the main text). The superscript  $\epsilon$  indicates dependence on the period  $\epsilon L$  used to define the geometry. Species concentration and diffusivity are denoted  $C_c^\epsilon(\mathbf{x}, t)$  and  $D_c^\epsilon$  in the cytoplasm, and  $C_n^\epsilon(\mathbf{x}, t)$  and  $D_n^\epsilon$  in the nucleus. We assume that the nucleus and cytoplasm are isotropic, so that the diffusivities are scalar and constant. Because cytoplasmic and nuclear diffusivities are defined in their respective regions, the coefficients oscillate with period  $Y$ :

$$D_{c,n}^\epsilon(\mathbf{x}) = \begin{cases} D_{c,n} & \text{if } \mathbf{x} \in \Omega_{c,n}^\epsilon, \\ 0 & \text{otherwise.} \end{cases}$$

**Nondimensionalization.** The microscopic problem for concentration dynamics is given by

$$\frac{\partial C_c^\epsilon}{\partial t} = \nabla \cdot (D_c^\epsilon \nabla C_c^\epsilon), \quad \mathbf{x} \in \Omega_c^\epsilon, \quad [\text{S1}]$$

$$\frac{\partial C_n^\epsilon}{\partial t} = \nabla \cdot (D_n^\epsilon \nabla C_n^\epsilon), \quad \mathbf{x} \in \Omega_n^\epsilon, \quad [\text{S2}]$$

$$D_c^\epsilon \nabla C_c^\epsilon \cdot \mathbf{n} = D_n^\epsilon C_n^\epsilon \cdot \mathbf{n}, \quad \mathbf{x} \in \Gamma^\epsilon, \quad [\text{S3}]$$

$$D_c^\epsilon \nabla C_c^\epsilon \cdot \mathbf{n} = k_+ C_c^\epsilon - k_- C_n^\epsilon, \quad \mathbf{x} \in \Gamma^\epsilon. \quad [\text{S4}]$$

Here  $\mathbf{n}$  is the outward normal to the boundary  $\Gamma^\epsilon$ . Continuity of flux on the surface of the nucleus is imposed, and nuclear import and export are modeled as first-order reactions with interfacial mass transfer coefficients,  $k_+$  and  $k_-$ . Their ratio  $\kappa = k_+/k_-$  represents an equilibrium constant for nucleocytoplasmic shuttling. Equivalent descriptions have been used to describe interfacial transport between two immiscible fluids (1, 2) as well as interfacial transfer in porous media (1, 3).

To nondimensionalize the problem, we introduce the following dimensionless variables:

$$\tilde{\mathbf{x}} = \mathbf{x}/l, \quad \tilde{t} = t/T, \quad \tilde{C}_c^\epsilon = C_c^\epsilon/C_{\text{ref}}, \quad \tilde{C}_n^\epsilon = C_n^\epsilon/C_{\text{ref}},$$

and dimensionless parameters:

$$\tilde{D}_c^\epsilon = \frac{T}{L^2} D_c^\epsilon, \quad \tilde{D}_n^\epsilon = \frac{T}{L^2} D_n^\epsilon, \quad \tilde{k}_- = \frac{T}{L} k_-, \quad \kappa = k_+/k_-,$$

where  $T$  is the total duration of the last five nuclear cycles and  $C_{\text{ref}}$  is a reference concentration. These dimensionless numbers

provide a measure for the relative influence of the system phenomena. By investigating orders of magnitude, we can determine the dominating mechanism that governs the concentration dynamics. Therefore, careful attention must be given to the dimensionless values because different types of macroscopic limit problems may result (3, 4).

The dimensionless numbers in this study are determined from the measurements for the diffusion constant of biologically inert molecules in the early embryo (5), cortical geometry (6), and nuclear cycle duration (7):

$$D_c = 15 \mu\text{m}^2/\text{s}, \quad L = 490 \mu\text{m}, \quad T = 7,200 \text{ s}. \quad [\text{S5}]$$

The effective nuclear lifetime of Bicoid (Bcd) was measured to be about  $\tau = 70$  s (6). Assuming Bcd is not degraded in the nucleus, we can compute the nuclear export rate using the average volume  $V_n$  and surface area  $S_n$  of a spherical nucleus at cycle 12 [average diameter  $\approx 9 \mu\text{m}$  (6)]:

$$k_- = \frac{V_n}{S_n \tau} = 0.021 \mu\text{m}/\text{s}. \quad [\text{S6}]$$

According to Eqs. S5 and S6, the following dimensionless parameters are calculated:

$$\tilde{D}_c^\epsilon = 0.45, \quad \tilde{k}_- = 0.31.$$

To ensure proper scale separation such that the homogenization process works, the following condition must hold (3):

$$\frac{l^2}{TD_c^\epsilon} = \frac{\epsilon^2}{\tilde{D}_c^\epsilon} \sim O(\epsilon^2). \quad [\text{S7}]$$

On the basis of our calculation for  $\tilde{D}_c^\epsilon$ , the condition of Eq. S7 is met.

On account of lacking a measurement for the nuclear diffusion coefficient, we investigate possible regimes in which the diffusion coefficient may lie. We perform the homogenization analysis for different values of the exponent  $m$  in

$$\frac{D_n^\epsilon}{D_c^\epsilon} \sim O(\epsilon^m)$$

and compare the results. For  $m < 2$ , we find that the limit problems determined from homogenization are the same, assuming  $\tilde{D}_c^\epsilon$ ,  $\tilde{k}_-$ , and  $\kappa \sim O(1)$  (see ref. 4 for details). For ease of presentation, we let  $m = 0$ . Essentially, we are in a regime in which diffusion inside the nucleus does not affect morphogen gradient dynamics on the macroscale.

It is necessary to determine the strength of interfacial mass transfer relative to the diffusion process. In the literature (3), the Sherwood number is a dimensionless number relating the diffusivity of the interfacial barrier to the diffusivity within the component, similar to the Biot number in heat transfer. In our model, the Sherwood number is  $\frac{k_-}{D_c^\epsilon} = \epsilon \frac{\tilde{k}_-}{\tilde{D}_c^\epsilon} \sim O(\epsilon)$ . On the basis of this calculation and experimental observation, we assume the system is in a regime of rapid nucleocytoplasmic kinetics (3). Thus, nuclear exchange occurs fast enough for cytoplasmic and nuclear concentrations to be in local equilibrium;  $\kappa$  represents the ratio of concentrations. Although a measurement for the nuclear import rate is unavailable, we can extract a value for  $\kappa$  from the concentration

profiles visualized in *Drosophila* embryos. Bicoid profiles are identified in embryos that have endogenous Bcd replaced with a fluorescent eGFP-Bcd fusion protein (6), from which it is determined that  $\kappa \sim 5$ .

The following dimensionless system is obtained:

$$\epsilon^2 \frac{\partial \tilde{C}_c^e}{\partial \tilde{t}} = \tilde{\nabla} \cdot (\tilde{D}_c^e \tilde{\nabla} \tilde{C}_c^e), \quad \tilde{\mathbf{x}} \in \tilde{\Omega}_c^e, \tilde{t} \in (0,1), \quad [\text{S8}]$$

$$\epsilon^2 \frac{\partial \tilde{C}_n^e}{\partial \tilde{t}} = \tilde{\nabla} \cdot (\tilde{D}_n^e \tilde{\nabla} \tilde{C}_n^e), \quad \tilde{\mathbf{x}} \in \tilde{\Omega}_n^e, \tilde{t} \in (0,1), \quad [\text{S9}]$$

$$\tilde{D}_c^e \tilde{\nabla} \tilde{C}_c^e \cdot \mathbf{n} = \tilde{D}_n^e \tilde{\nabla} \tilde{C}_n^e \cdot \mathbf{n}, \quad \tilde{\mathbf{x}} \in \tilde{\Gamma}^e, \tilde{t} \in (0,1), \quad [\text{S10}]$$

$$\tilde{D}_c^e \tilde{\nabla} \tilde{C}_c^e \cdot \mathbf{n} = \epsilon \tilde{k}_- (\kappa \tilde{C}_c^e - \tilde{C}_n^e), \quad \tilde{\mathbf{x}} \in \tilde{\Gamma}^e, \tilde{t} \in (0,1). \quad [\text{S11}]$$

**Details of the Homogenization Approach.** We describe here the approach for deriving an equivalent macroscopic description from the dimensionless microscopic system (Eqs. S8–S11). Tildes are dropped for convenience.

**Asymptotic expansion.** The syncytium is considered a multiscale system; we characterize it by two spatial variables, a local variable  $\mathbf{y}$  and a global variable  $\mathbf{x} = \epsilon \mathbf{y}$ . The gradient operator is written as

$$\nabla \equiv \nabla_{\mathbf{y}} + \epsilon \nabla_{\mathbf{x}},$$

where the subscripts indicate the partial derivatives with respect to  $\mathbf{x}$  and  $\mathbf{y}$ . The two-scale asymptotic expansions for  $C_c^e$  and  $C_n^e$  have the form

$$C_c^e(\mathbf{x}, \mathbf{y}, t) = C_{c0}(\mathbf{x}, \mathbf{y}, t) + \epsilon C_{c1}(\mathbf{x}, \mathbf{y}, t) + \epsilon^2 C_{c2}(\mathbf{x}, \mathbf{y}, t) + \dots,$$

$$C_n^e(\mathbf{x}, \mathbf{y}, t) = C_{n0}(\mathbf{x}, \mathbf{y}, t) + \epsilon C_{n1}(\mathbf{x}, \mathbf{y}, t) + \epsilon^2 C_{n2}(\mathbf{x}, \mathbf{y}, t) + \dots,$$

where each term  $C_j(\mathbf{x}, \mathbf{y}, t)$  is  $Y$ -periodic with respect to the microscopic variable. We begin the homogenization approach with an asymptotic analysis of the nondimensional system. First, the microscale problem is rewritten in terms of the asymptotic expansions. Then, by comparing the coefficients of different powers of  $\epsilon$ , a cascade of equations for each term  $C_j(\mathbf{x}, \mathbf{y}, t)$  is obtained. The boundary value problem in terms of  $\epsilon$  is

$$\epsilon^2 \frac{\partial C_c^e}{\partial t} = (A_0^e + \epsilon^1 A_1^e + \epsilon^2 A_2^e) C_c^e, \quad \mathbf{x} \in \Omega, \mathbf{y} \in \Omega^e, \quad [\text{S12}]$$

$$\epsilon^2 \frac{\partial C_n^e}{\partial t} = (A_0^n + \epsilon^1 A_1^n + \epsilon^2 A_2^n) C_n^e, \quad \mathbf{x} \in \Omega, \mathbf{y} \in \Omega^e, \quad [\text{S13}]$$

$$D_c^e (\nabla_{\mathbf{y}} + \epsilon \nabla_{\mathbf{x}}) C_c^e \cdot \mathbf{n} = \epsilon k_- (\kappa C_c^e - C_n^e), \quad \mathbf{x} \in \Omega, \mathbf{y} \in \Gamma^e, \quad [\text{S14}]$$

$$D_n^e (\nabla_{\mathbf{y}} + \epsilon \nabla_{\mathbf{x}}) C_n^e \cdot \mathbf{n} = \epsilon k_- (\kappa C_c^e - C_n^e), \quad \mathbf{x} \in \Omega, \mathbf{y} \in \Gamma^e, \quad [\text{S15}]$$

where, for  $i \in \{c, n\}$ ,

$$A_0^i = \nabla_{\mathbf{y}} \cdot (D_i^e \nabla_{\mathbf{y}}), \quad A_1^i = \nabla_{\mathbf{y}} \cdot (D_i^e \nabla_{\mathbf{x}}) + \nabla_{\mathbf{x}} \cdot (D_i^e \nabla_{\mathbf{y}}),$$

$$A_2^i = D_i^e \nabla_{\mathbf{x}}^2.$$

**Lowest order problems.** The next step of the multiscale expansion method is to solve the problems for the lowest power of  $\epsilon$ . The problem for cytoplasmic concentration at  $O(1)$  is

$$A_0^c C_{c0} = 0, \quad D_c^e \nabla_{\mathbf{y}} C_{c0} \cdot \mathbf{n} = 0.$$

Because  $C_{c0}$  is periodic in  $Y$ , it follows that the only solution is a function independent of the local variable,  $C_{c0} = C_{c0}(\mathbf{x}, t)$ . By similar reasoning, the only solution to

$$A_0^n C_{n0} = 0, \quad D_n^e \nabla_{\mathbf{y}} C_{n0} \cdot \mathbf{n} = 0,$$

in the region  $\Omega_n^e$ , is a function independent of the local variable,  $C_{n0} = C_{n0}(\mathbf{x}, t)$ . The functions  $C_{c0}(\mathbf{x}, t)$  and  $C_{n0}(\mathbf{x}, t)$  serve as the first-term approximations.

**The reference cell problem.** The multiple scales approach of homogenization yields a boundary value problem that must be solved in order to determine the effective diffusivity. This boundary value problem, commonly referred to as the *cell problem*, arises from solving Eqs. S12–S15 at  $O(\epsilon)$ :

$$A_0^c C_{c1} + A_1^c C_{c0} = 0, \quad [\text{S16}]$$

$$A_0^n C_{n1} + A_1^n C_{n0} = 0, \quad [\text{S17}]$$

$$D_c^e (\nabla_{\mathbf{y}} C_{c1} + \nabla_{\mathbf{x}} C_{c0}) \cdot \mathbf{n} = k_- (\kappa C_{c0} - C_{n0}), \quad [\text{S18}]$$

$$D_n^e (\nabla_{\mathbf{y}} C_{n1} + \nabla_{\mathbf{x}} C_{n0}) \cdot \mathbf{n} = k_- (\kappa C_{c0} - C_{n0}). \quad [\text{S19}]$$

We have shown that both  $C_{c0}$  and  $C_{n0}$  are  $\mathbf{y}$ -independent. From the divergence theorem, the right-hand sides of Eqs. S18 and S19 are zero. Thus,  $C_{n0} = \kappa C_{c0}$ , which signifies that the cytoplasmic and nuclear concentrations are in local equilibrium.

Eqs. S17 and S19 reduce to

$$\nabla_{\mathbf{y}} \cdot (D_n^e (\nabla_{\mathbf{y}} C_{n1} + \nabla_{\mathbf{x}} C_{n0})) = 0, \quad D_n^e (\nabla_{\mathbf{y}} C_{n1} + \nabla_{\mathbf{x}} C_{n0}) \cdot \mathbf{n} = 0.$$

To solve this system, we define a function

$$\alpha(\mathbf{x}, \mathbf{y}, t) = C_{n1} + \mathbf{y} \cdot \nabla_{\mathbf{x}} C_{n0} + \tilde{\alpha}(\mathbf{x}, t),$$

that satisfies

$$\nabla_{\mathbf{y}} \cdot (D_n^e \nabla_{\mathbf{y}} \alpha) = 0, \quad D_n^e \nabla_{\mathbf{y}} \alpha \cdot \mathbf{n} = 0,$$

in the region  $\Omega_n^e$ . The solution,  $\alpha(\mathbf{x}, \mathbf{y}, t) = 0$ , generates the following equality:

$$D_n^e (\nabla_{\mathbf{y}} C_{n1} + \nabla_{\mathbf{x}} C_{n0}) = \mathbf{0}. \quad [\text{S20}]$$

From Eqs. S16 and S18:

$$\nabla_{\mathbf{y}} \cdot (D_c^e (\nabla_{\mathbf{y}} C_{c1} + \nabla_{\mathbf{x}} C_{c0})) = 0, \quad D_c^e (\nabla_{\mathbf{y}} C_{c1} + \nabla_{\mathbf{x}} C_{c0}) \cdot \mathbf{n} = 0.$$

A separation of variables for  $C_{c1}$  yields

$$C_{c1} = \mathbf{f}(\mathbf{y}) \cdot \nabla_{\mathbf{x}} C_{c0} + \tilde{C}_{c1}(\mathbf{x}, t), \quad [\text{S21}]$$

where  $\tilde{C}_{c1}(\mathbf{x}, t)$  is an arbitrary function independent of the microscopic variable and  $\mathbf{f}(\mathbf{y})$  is a correction to the homogenized solution  $C_{c0}(\mathbf{x}, t)$ . The function  $f_k$  is the  $Y$ -periodic solution to the cell problem:

$$\nabla_{\mathbf{y}} \cdot (D_c^e (\nabla_{\mathbf{y}} f_k + \mathbf{e}_k)) = 0, \quad \mathbf{y} \in \Omega^e, \quad [\text{S22}]$$

$$D_c^e (\nabla_{\mathbf{y}} f_k + \mathbf{e}_k) \cdot \mathbf{n} = 0, \quad \mathbf{y} \in \Gamma^e. \quad [\text{S23}]$$

The cell problems are solved numerically; details of the calculations are described below.

**The homogenized equation.** The third term in the expansion of cytoplasmic and nuclear concentrations must be considered in order to obtain a first-term approximation. The problem at  $O(\epsilon^2)$  is

$$\frac{\partial C_{c0}}{\partial t} = A_0^c C_{c2} + A_1^c C_{c1} + A_2^c C_{c0}, \quad [\text{S24}]$$

$$\frac{\partial C_{n0}}{\partial t} = A_0^n C_{n2} + A_1^n C_{n1} + A_2^n C_{n0}, \quad [\text{S25}]$$

$$D_c^\epsilon (\nabla_y C_{c2} + \nabla_x C_{c1}) \cdot \mathbf{n} = k_- (\kappa C_{c1} - C_{n1}), \quad [\text{S26}]$$

$$D_n^\epsilon (\nabla_y C_{n2} + \nabla_x C_{n1}) \cdot \mathbf{n} = k_- (\kappa C_{c1} - C_{n1}). \quad [\text{S27}]$$

To obtain an equation for nuclear dynamics, we integrate Eq. S25 on  $\Omega_n^\epsilon$  and apply Eqs. S27 and S20:

$$|\Omega_n^\epsilon| \frac{\partial C_{n0}}{\partial t} = \int_{\Gamma^\epsilon} k_- (\kappa C_{c1} - C_{n1}) dS_y. \quad [\text{S28}]$$

Next, we integrate Eq. S24 on  $\Omega_c^\epsilon$  and apply Eqs. S26 and S21 and the periodicity condition to obtain an evolution equation for cytoplasmic concentration:

$$|\Omega_c^\epsilon| \frac{\partial C_{c0}}{\partial t} = \frac{\partial C_{c0}^2}{\partial x_j \partial x_k} \int_{\Omega_c^\epsilon} D_c \left( \frac{\partial f_k}{\partial y_j} + \delta_{jk} \right) dV_y - \int_{\Gamma^\epsilon} k_- (\kappa C_{c1} - C_{n1}) dS_y, \quad [\text{S29}]$$

where  $\delta_{jk}$  is the Kronecker delta function and summation notation is assumed. Because cytoplasmic and nuclear concentrations are in local equilibrium, Eqs. S28 and S29 yield a first-order approximation for cytoplasmic concentration:

$$(\phi + (1 - \phi)\kappa) \frac{\partial C_{c0}}{\partial t} = \mathbf{D}_G \nabla_x^2 C_{c0}, \quad \mathbf{x} \in \Omega.$$

The components of the effective diffusion tensor  $\mathbf{D}_G = (D_{jk})_{j,k}$  are defined as

$$D_{jk} = \frac{1}{|Y|} \int_{\Omega_c^\epsilon} D_c \left( \frac{\partial f_k}{\partial y_j} + \delta_{jk} \right) dV_y.$$

In general, the tensor is symmetric and positive definite. The geometry of the cortical region of the early embryo, namely, a layer of symmetric inclusions between two reflective surfaces, generates a diffusion tensor with zero elements except for  $D_{11} = D_{22}$ . Therefore, the system pertaining to this paper yields a  $D_G$  that is scalar and, without loss of generality, is determined by the cell problem for  $f_1$ :

$$D_G = \frac{1}{|Y|} \int_{\Omega_c^\epsilon} D_c \left( \frac{\partial f_1}{\partial y_1} + 1 \right) dV_y.$$

Note in the main text we refer to the relative diffusivity,  $G = D_G/D_c$ .

**Numerical Calculation of the Effective Diffusivity.** In order to determine the effective diffusivity defined in Eq. 4 of the main text, the cell problem (Eqs. S22 and S23) is solved using finite element

methods with COMSOL Multiphysics (COMSOL, Inc.). The problem for  $f_1$  simplifies to solving Laplace's equation in  $\Omega_c^\epsilon$ , with boundary condition

$$\nabla f_1 \cdot \mathbf{n} = \mathbf{e}_1 \cdot \mathbf{n}$$

on the surface of the nucleus. The reference cell is modeled as a sphere inside a cuboid of variable size (Fig. 2C in the main text). Periodic boundary conditions on the lateral faces are imposed, as well as a reflective boundary condition on the top of the cuboid, the barrier between the embryo and the outside environment. We also impose a reflective boundary condition on the bottom of the cuboid, which we recognize as an assumption, because there is no well defined barrier between the periplasm and yolk. Each cell problem needs to be solved only once for a given geometric configuration.

As an test of our results using finite element methods, we solved the problem on a  $201^3$  grid with the successive overrelaxation method. Convergence was assumed when the solution changed by less than  $10^{-4}\%$  in one iteration. The results are nearly identical, with an error on the order of  $10^{-3}$ . As a test of the homogenization approach for the case  $\kappa = 0$ , we performed Brownian-motion simulations of point particles to determine the diffusivity in the presence of spherical obstacles. The resulting effective diffusivities matched with the results obtained by homogenization (8).

**Geometric Effects.** In this section we address the sensitivity of our results on model geometry. It is observed that syncytial nuclei are arranged in a quasi-hexagonal lattice in the cortical region of the early embryo (9). For convenience, nuclei are aligned in a cubic lattice in our model. We check our results against simulations performed for nuclei arranged in a hexagonal lattice (8) and confirm that the configuration of inclusions has little influence on the diffusivity. This conclusion is consistent with previous studies (10, -12).

We also consider what happens to the diffusivity during cycle 14A when nuclei transform into objects shaped like rice grains. We investigate the effect of unidirectionally oriented inclusions on the diffusivity by simulating prolate spheroids with the major axis perpendicular to the plasma membrane. Consistent with other models, we conclude that the lateral diffusivity is lower for elongated nuclei than for nonelongated nuclei of the same volume (10, 11). Therefore, as nuclei lengthen during cycle 14A, a decreasing observed diffusion coefficient is expected (Fig. S1). We note, however, that the effect is not very significant (only  $\approx 7\%$  change). On the other hand, if the volume of a nucleus increases as it lengthens, elongation during late cycle 14A may play a more substantial role in decreasing the diffusivity. The insignificance of shape alone is apparent in Fig. S2, where the effective diffusivity for a range of parameters is plotted for both spherical nuclei and elongated nuclei.

**Accuracy of the Maxwell Approximation.** The relative effective diffusivity is a function of the geometry of the problem, namely, nuclear diameter, cortical thickness, the distance between the periodically arranged nuclei (size of the reference cell), and the distance between the nuclei and the outer membrane (position of a nucleus within the reference cell). We postulate that the portion of the effective diffusivity that depends only on geometry,  $G$ , can be described by Maxwell's formula, an expression that depends only on the volumetric space occupied by the nuclei. For a spherical nucleus inside a cuboidal cell, nuclear volume fraction is  $1 - \phi = \frac{4/3\pi r^3}{l^3}$ , which suggests that the effective diffusivity is independent of the precise location of the nuclei within the reference cell. It also implies that the effective diffusivity depends on a specific relationship of the geometric parameters,  $\frac{r^3}{l^3}$ , rather than on their exact values. We test the approximation of this

approximation by investigating the worse case: impenetrable nuclei, when  $\kappa = 0$  and the relative effective diffusivity is  $\frac{D_{\text{eff}}}{D_c} = \frac{G}{\phi}$ . By scanning the range of physical parameters, we find that the maximum error is less than 6%. Accuracy is worst when the nuclei are very densely packed such that  $l \approx 2r$  or when the cortical thickness is about the size of the nuclei,  $h \approx 2r$ . For the physical case when molecules can enter and exit the nuclei, we find that the error decreases with increasing  $\kappa$ . Specifically, for  $\kappa = 1$ , the error is less than 4%, and for  $\kappa = 5$ , the error is less than 2%. We therefore conclude that, for the physical range of parameters that describe the syncytial embryo, the geometric portion of the effective diffusivity can be accurately described by Maxwell's approximation.

**Derivation of the Analytic Approximation.** Maxwell's formula provides an exact approximation to the effective diffusivity when the reference cell is a cube. Although we have concluded that this historical formula provides a good estimate for our system, we seek an even better analytical approximation that accounts for the anisotropy of the cortical region. We do so by manipulating Maxwell's formula to derive an expression that depends not only on  $\phi$  and  $\kappa$  but also on the detailed geometry of the syncytium, namely, nuclear radius and cortical thickness:

$$G = 1 - \frac{3(1-\phi)}{2 + \alpha(1-\phi)^{3/2}}, \quad [\text{S30}]$$

where  $\alpha = \sqrt{\frac{3}{4\pi}} \left(\frac{h}{r}\right)^{3/2}$ . This estimate for the effective diffusivity is within 2% of our numerical results. Note that in the limit  $\alpha \rightarrow 1/\sqrt{1-\phi}$ , Maxwell's approximation is recovered. The expression is derived to provide an approximation for a noncubic reference cell, for the two cases of anisotropy: (i) The height of the cortex is greater than the length of the reference cell  $h > l$ , and (ii) the height of the cortex is smaller than the length of the reference cell  $h < l$ . For both cases, the analytic approximation is obtained by constructing a cube of length  $l$  around the spherical nucleus. We suppose that the effective diffusivity for this region follows Maxwell's formula:

$$\hat{G} = \frac{2\hat{\phi}}{3 - \hat{\phi}},$$

where

$$1 - \hat{\phi} = \frac{V_n}{\hat{V}_T} = \frac{V_n}{l^3}$$

is the volume fraction of the sphere inside the imagined cube. For the first case, the imagined cube is smaller than the reference cell. We assume molecules undergo free diffusion in the cytoplasmic region outside of the cube. The weighted average of the two diffusivities,

$$G = \frac{\hat{V}_T}{V_T} \hat{G} + \left(1 - \frac{\hat{V}_T}{V_T}\right),$$

yields Eq. S30. For the second case, the constructed cube is larger than the reference cell. We suppose that the effective diffusivity of the cube can be written in terms of the weighted average of the diffusivity of the reference cell and the (free) diffusivity in region outside of the reference cell:

$$\hat{G} = \frac{V_T}{\hat{V}_T} G + \left(1 - \frac{V_T}{\hat{V}_T}\right).$$

This also gives Eq. S30. Note in Fig. S2, the approximation breaks down when either the height of the cortical region or the length of

the reference cell is about the same size as the diameter of the nucleus, presumably because we can no longer accurately capture molecular movement in an environment where inclusions are not well separated. The approximation, however, is still within 2% of our numerical results.

**Three-Dimensional Analysis.** We evaluate how well the homogenization technique approximates the real solution to the diffusion problem by comparing our homogenization results with 3-dimensional simulations of the problem. Spherical nuclei are arranged periodically along the length of the embryo. We take a section of the monolayer and impose the following boundary conditions: constant production at the anterior end of the embryo, zero flux at the posterior end, zero flux at the outer and inner membranes of the cortex, and periodic boundary conditions on the lateral faces. Solving the microscopic system, Eqs. S1–S4, with COMSOL Multiphysics (COMSOL) for a range of values for  $\kappa$  and  $\phi$ , we find that the solution matches the homogenized solution with an error <1% (illustrated in Fig. 2D of the main text).

**Details of Modeling the Bicoid Gradient.** The 1-dimensional system of equations for the dynamics of Bicoid is given by

$$\frac{\partial C_c}{\partial t} = D_{\text{eff}} \frac{\partial^2 C_c}{\partial x^2} - \frac{(\phi k_c + \kappa(1-\phi)k_n)}{\phi + \kappa(1-\phi)} C_c + \frac{\phi}{\phi + \kappa(1-\phi)} j(x), \quad [\text{S31}]$$

$$D_{\text{eff}} \frac{\partial C_c}{\partial x} \Big|_{x=0} = 0, \quad D_{\text{eff}} \frac{\partial C_c}{\partial x} \Big|_{x=L} = 0. \quad [\text{S32}]$$

The system is nondimensionalized using the following transformations:  $z = x/L$ ,  $\tau = t/T$ , and  $C(z, \tau) = D_c C(x, t)/QL$ .

The effective diffusivity changes between nuclear cycles and is described by a piecewise constant function (Fig. S4). Gregor et al. (6) demonstrated that nuclear diameter increases during interphase, which explains the experimentally observed decrease in nuclear concentration during each cycle. Because we do not consider a dynamic nuclear diameter in this study, nuclear concentration predicted by the model actually increases during interphase (Fig. S5D). We note that a changing nuclear diameter can be included in the model by describing the effective diffusivity by a piecewise linear, time-dependent function.

**Procedure to determine the width and stability of the gradient.** The Bcd concentration profile is observed to have an exponential shape with a decay length between 10% and 20% of the embryo length (5). Using Matlab's fit function, we fit our numerical solution at the end of interphase  $i$  to an exponential curve:  $Ae^{-z/\lambda_i}$ . If  $0.1 \leq \lambda \leq 0.2$ , then the gradient is considered to have the correct shape. We also ensure our numerical results are consistent with the nuclear-stability criterion: Gradients of nuclear Bcd are at least 10% accurate over the last five nuclear cycles between 10% and 50% of the embryo length (6). Stability is checked by computing the relative change of the gradient between two successive nuclear cycles:  $g_{i,i-1}(z) = (N_i(z) - N_{i-1}(z))/N_{i-1}(z)$ , where  $0.1 \leq z \leq 0.5$  and  $N_i(z)$  is the nondimensional nuclear concentration of cycle  $i$ . The function  $g$  is then averaged over both space and consecutive cycles. If the absolute value of the result is less than 0.1, the nuclear gradient is considered stable.

An example of gradient dynamics predicted by the model is shown in Fig. S5. The results are consistent with the shape, stability, and diffusivity determined by experiments. Examples of nuclear gradients that do not fit the criteria are shown in Fig. S6.
